# Supplementary material for: Development of a Nomogram to Predict the Outcome for Patients with Soft Tissue Sarcoma
Source: MDPI journal article supplement (doi:10.3390/vetsci10040266), 2023-03-29
Supplement: s1 [file s1]

**Supplementary Table S1:** Example of the R code used to develop the clinical nomogram. This utilised the 'rms' and 'survival' packages in R.

---

```
#RMS load data and nomogram construction
nomo <- read.csv("Clinical_train.csv", TRUE)
library(rms)
mod.Cox <- cph(Surv(DFI, CENSR) ~Palpnew + Mitoticate + Necrosis, nomo,surv=TRUE)
ddist <- datadist(nomo)
options(datadist='ddist')
surv.Cox <- Survival(mod.Cox)
nom.Cox <- nomogram(mod.Cox,fun=list(function(x)surv.Cox(1095,x)),funlabel=c("3-year
DFS"),lp=FALSE)
plot(nom.Cox)

#RMS validation of Cox model using validation dataset
nomo_valid <- read.csv("Clinical_valid.csv", TRUE)
fit_valid <- cph(Surv(DFI,CENSR) ~Palpnew + Mitoticate + Necrosis, nomo_valid,x=TRUE,
y=TRUE)
validate(fit_valid, method="boot", B=40, bw=FALSE, rule="aic",type="residual", sls=.05, aics=0,
force=NULL, estimates=TRUE, pr=FALSE, dxy=TRUE, u, tol=1e-9)

#RMS nomogram of IHC training data
nomo <- read.csv("IHC_test.csv", TRUE)
library(rms)
mod.Cox <- cph(Surv(DFI, CENSR) ~VEGF + Decorin + Mitoticate + Age, nomo,surv=TRUE)
ddist <- datadist(nomo)
options(datadist='ddist')
surv.Cox <- Survival(mod.Cox)
nom.Cox <- nomogram(mod.Cox,fun=list(function(x)surv.Cox(1095,x)),funlabel=c("3-year
DFS"),lp=FALSE)
plot(nom.Cox)

#RMS validation of Cox model using IHC_validation dataset
nomo_valid <- read.csv("IHC_test.csv", TRUE)
fit_valid <- cph(Surv(DFI, CENSR) ~VEGF + Decorin + Mitoticate + Age, nomo_valid,x=TRUE,
y=TRUE)
validate(fit_valid, method="boot", B=40, bw=FALSE, rule="aic", type="residual", sls=.05, aics=0,
force=NULL, estimates=TRUE, pr=FALSE, dxy=TRUE, u, tol=1e-9)
```

---

**Supplementary Table S2.** Results from statistical analysis of all patient and tumour characteristics used in the Clinical\_train dataset.

|                                     | Mean   | Median | Signif.    | HR<br>(95% CI)    |
|-------------------------------------|--------|--------|------------|-------------------|
| <b>Disease free interval (days)</b> | 764.57 | 655    |            |                   |
| <b>Recurrence</b>                   |        |        |            |                   |
| Recur = 27 (27%)                    |        |        |            |                   |
| No recur = 75 (73%)                 |        |        |            |                   |
| <b>Differentiation</b>              |        |        |            |                   |
| 1 = 54 (53%)                        |        |        | p= 0.7     | 1.2 (0.7 - 2.2)   |
| 2 = 38 (37%)                        |        |        |            |                   |
| 3 = 10 (10%)                        |        |        |            |                   |
| <b>Mitotic rate</b>                 |        |        |            |                   |
| 1 = 80 (78%)                        |        |        | P = 0.03   | 1.9 (1.1 - 3.2)   |
| 2 = 14 (14%)                        |        |        |            |                   |
| 3 = 8 (8%)                          |        |        |            |                   |
| <b>Necrosis</b>                     |        |        |            |                   |
| 0 = 74 (73%)                        |        |        | P = <0.001 | 2.8 (1.6 – 5.0)   |
| 1 = 23 (23%)                        |        |        |            |                   |
| 2 = 5 (5%)                          |        |        |            |                   |
| <b>Grade</b>                        |        |        |            |                   |
| 1 = 70 (69%)                        |        |        | P = <0.001 | 2.6 (1.6 - 4.3)   |
| 2 = 24 (24%)                        |        |        |            |                   |
| 3 = 8 (8%)                          |        |        |            |                   |
| <b>Age</b>                          |        |        |            |                   |
| 3 – 16 years                        | 9.657  | 9.5    |            | 1.0 (0.9 - 1.2)   |
| <b>Size</b>                         |        |        |            |                   |
| < 1cm = 6 (6%)                      |        |        | P = 0.1    | 1.0 (0.1 - 5)     |
| 1-5cm = 57 (56%)                    |        |        |            |                   |
| 5cm = 39 (38%)                      |        |        |            |                   |
| <b>Palpable</b>                     |        |        |            |                   |
| Mobile = 49 (48%)                   |        |        | P = 0.001  | 4.4 (1.8 - 11.05) |
| Fixed = 53 (52%)                    |        |        |            |                   |

**Supplementary Table S3.** Results from statistical analysis of all patient and tumour characteristics used in the IHC dataset.

|                                                                        | Mean | Median | Range | Signif.   | HR<br>(95% CI)                         |
|------------------------------------------------------------------------|------|--------|-------|-----------|----------------------------------------|
| <b>Disease free interval<br/>(days)</b>                                | 772  | 655    |       |           |                                        |
| <b>Recurrence</b><br>Recur = 26 (32%)<br>No recur = 56 (68%)           |      |        |       |           |                                        |
| <b>VEGF score</b><br>Low = 43 (52%)<br>High = 39 (47%)                 |      |        |       | p= <0.001 | 8.4 (2.9 - 24.4)                       |
| <b>Decorin score</b><br>1 = 26 (32%)<br>2 = 22 (27%)<br>3 = 34 (42%)   |      |        |       | p= 0.7    |                                        |
| <b>Differentiation</b><br>1 = 31 (38%)<br>2 = 40 (49%)<br>3 = 11 (13%) |      |        |       | p= 0.7    |                                        |
| <b>Mitotic rate</b><br>1 = 61 (74%)<br>2 = 12 (15%)<br>3 = 9 (11%)     |      |        |       | p= 0.6    |                                        |
| <b>Necrosis</b><br>0 = 54 (66%)<br>1 = 23 (28%)<br>2 = 5 (6%)          |      |        |       | p= 0.003  | -<br>1.1 (0.4 - 2.7)<br>7.2 (1.9 - 27) |
| <b>Grade</b><br>1 = 46 (56%)<br>2 = 27 (33%)<br>3 = 9 (11%)            |      |        |       | p= 0.5    |                                        |
| <b>Age</b>                                                             | 9.77 | 10     | 12    |           |                                        |
| <b>Size</b><br>< 1cm = 2 (2%)<br>1-5cm = 45 (55%)<br>>5cm = 21 (26%)   |      |        |       | p= 0.2    |                                        |
| <b>Palpable</b><br>Mobile = 32 (39%)<br>Fixed = 45 (55%)               |      |        |       | p= 0.03   | -<br>2.7 (1.1 - 8)                     |

**Supplementary File S1.** Dataset used in the creation of the Clinical Nomogram (Clinical\_train.csv)

**Supplementary File S2.** Dataset used to validate the Clinical Nomogram (Clinical\_valid.csv)

**Supplementary File S3.** Dataset used in the creation of the IHC Nomogram (IHC\_test all.csv)
